# Supplementary material for: Exploration of Cl⋯Cl and π⋯π stacking contacts along with the conductivity properties of a Cu-MOF featured with paddle-wheel SBUs
Source: Royal Society of Chemistry journal article supplement (doi:10.1039/d2ce01331b), 2022-12-12
Supplement: d2ce01331b1.pdf [file d2ce01331b1.pdf]

# Exploration of Cl $\cdots$ Cl and $\pi\cdots\pi$ stacking contacts along with conductivity properties of a Cu-MOF featured with paddle-wheel SBUs

Sanobar Naaz,<sup>a</sup> Pubali Das,<sup>b</sup> Souvik Mukherjee,<sup>c</sup> Samim Khan,<sup>a</sup> Goutam Pramanik,<sup>d</sup> Prasanta Ghosh,<sup>c</sup> Antonio Frontera,<sup>\*e</sup> Partha Pratim Ray<sup>\*b</sup> and Mohammad Hedayetullah Mir<sup>\*a</sup>

<sup>a</sup>Department of Chemistry, Aliah University, New Town, Kolkata 700 160, India.

<sup>b</sup>Department of Physics, Jadavpur University, Jadavpur, Kolkata 700 032, India.

<sup>c</sup>Department of Chemistry, R. K. M. Residential College, Narendrapur, Kolkata 700 103, India

<sup>d</sup>UGC-DAE CSR, Kolkata Centre, Sector III, LB-8, Bidhan Nagar, Kolkata 700 106, India.

<sup>e</sup>Departament de Química, Universitat de les Illes Balears, Crta de Valldemossa km 7.5, 07122 Palma de Mallorca (Balears), Spain.

To whom correspondence should be addressed. E-mail: [toni.frontera@uib.es](mailto:toni.frontera@uib.es); [partha@phys.jdvu.ac.in](mailto:partha@phys.jdvu.ac.in) and [chmmir@gmail.com](mailto:chmmir@gmail.com)

**Supporting Information**

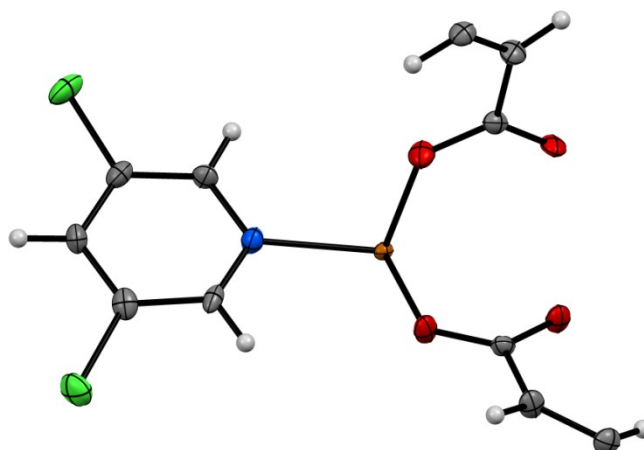

**Fig. S1** Asymmetric unit of compound **1** with 30% ellipsoid plot. Carbon: black; nitrogen: blue; oxygen: red; hydrogen: grey; copper: brown.

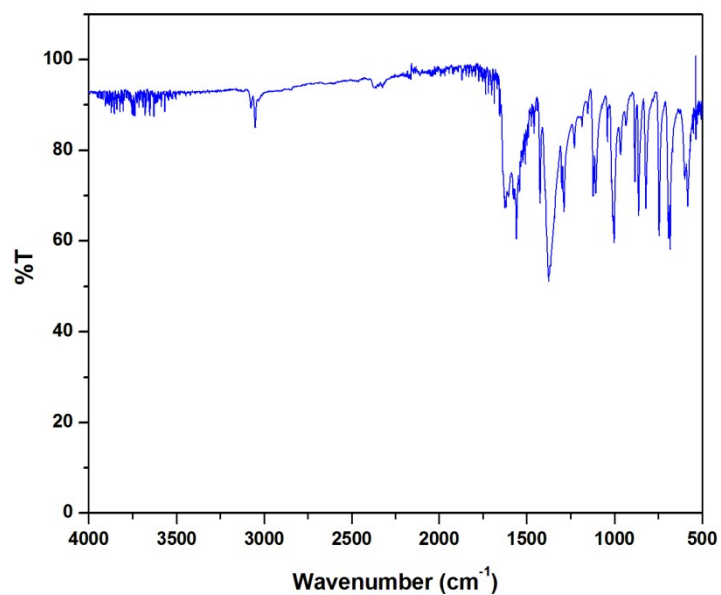

**Fig. S2** IR spectrum of compound **1**.

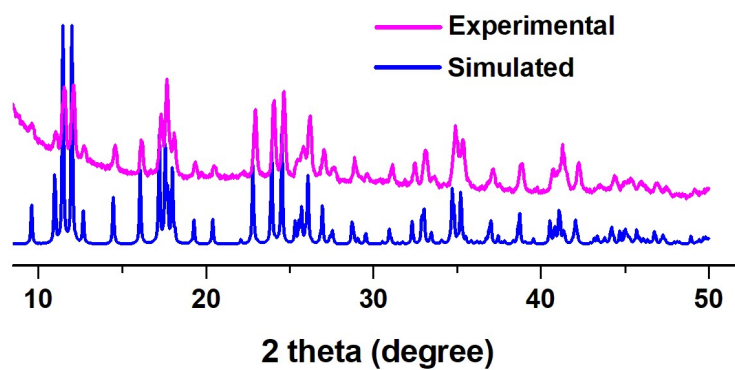

**Fig. S3** PXRD data of simulated **1** (blue) and as-synthesized **1** (pink).

**Table S1** Crystal data and refinement parameters of compound **1**

|                                                                          |                                                                               |
|--------------------------------------------------------------------------|-------------------------------------------------------------------------------|
| Formula                                                                  | C <sub>11</sub> H <sub>7</sub> Cl <sub>2</sub> CuNO <sub>4</sub> ( <b>1</b> ) |
| fw                                                                       | 351.63                                                                        |
| cryst syst                                                               | Triclinic                                                                     |
| space group                                                              | $P\bar{1}$                                                                    |
| <i>a</i> (Å)                                                             | 7.8327(11)                                                                    |
| <i>b</i> (Å)                                                             | 8.7671(13)                                                                    |
| <i>c</i> (Å)                                                             | 10.3665(15)                                                                   |
| $\alpha$ (deg)                                                           | 109.953(6)                                                                    |
| $\beta$ (deg)                                                            | 105.723(6)                                                                    |
| $\gamma$ (deg)                                                           | 95.799(7)                                                                     |
| <i>V</i> (Å <sup>3</sup> )                                               | 629.20(16)                                                                    |
| <i>Z</i>                                                                 | 2                                                                             |
| <i>D</i> <sub>calcd</sub> (g/cm <sup>3</sup> )                           | 1.856                                                                         |
| $\mu$ (mm <sup>-1</sup> )                                                | 2.167                                                                         |
| $\lambda$ (Å)                                                            | 0.71073                                                                       |
| GOF on <i>F</i> <sup>2</sup>                                             | 1.021                                                                         |
| Final <i>R</i><br>indices<br>[ <i>I</i> > 2σ( <i>I</i> )] <sup>a,b</sup> | <i>R</i> 1 = 0.0841<br><i>wR</i> 2 = 0.2653                                   |

$${}^aR1 = \Sigma||F_o| - |F_c|| / \Sigma|F_o|, {}^b{}wR2 = [\Sigma w(F_o^2 - F_c^2)^2 / \Sigma w(F_o^2)^2]^{1/2}$$

**Table S2** Selected bond lengths and bond angles of **1**

| <b>Bond length (Å)</b> |          |
|------------------------|----------|
| Cu(1)-O(1)             | 1.971(8) |
| Cu(1)-O(3)             | 1.977(9) |
| Cu(1)-N(1)             | 2.173(9) |
| Cu(1)-O(2)a            | 1.991(8) |
| Cu(1)-O(4)a            | 1.973(9) |
| <b>Bond angle (°)</b>  |          |
| O(1)-Cu(1)-O(3)        | 90.0(4)  |
| O(1)-Cu(1)-N(1)        | 100.2(4) |
| O(1)-Cu(1)-O(2)a       | 168.7(3) |
| O(1)-Cu(1)-O(4)a       | 89.8(4)  |
| O(3)-Cu(1)-N(1)        | 94.6(4)  |
| O(2)a-Cu(1)-O(3)       | 89.4(4)  |
| O(3)-Cu(1)-O(4)a       | 168.2(4) |
| O(2)a-Cu(1)-N(1)       | 91.1(3)  |
| O(4)a-Cu(1)-N(1)       | 97.0(4)  |
| O(2)a-Cu(1)-O(4)a      | 88.5(4)  |

Symmetric transformation: a = 1-x, 1-y, 1-z

**Table S3**  $\pi \cdots \pi$  interactions in **1**

| Ring(I) $\rightarrow$ Ring(J) | Distance between the (i,j) ring centroids (Å) in the crystal |
|-------------------------------|--------------------------------------------------------------|
| R(1) $\rightarrow$ R(1)a      | 3.549(7)                                                     |

R(J) denotes the j-th ring: R(1) = N(1)-C(1)-C(2)-C(3)-C(4)-C(5);  
Symmetry transformation: a = 1-x, 2-y, 2-z

**Table S4** Cl $\cdots$ Cl interactions in **1**

| X $\cdots$ X   | (Å)   |
|----------------|-------|
| Cl(1)...Cl(2)a | 3.670 |
| Cl(2)...Cl(1)a | 3.670 |
| Cl(2)...Cl(2)b | 3.670 |

Symmetry transformation: a = 1-x, 2-y, 2-z; b = -x, 2-y, 2-z

**Table S5** A comparison of conductivity result of **1** with reported CPs.

| MOFs                                                                                                       | Conductivity<br>(S m <sup>-1</sup> ) | Reference        |
|------------------------------------------------------------------------------------------------------------|--------------------------------------|------------------|
| [Cu(muco)(3,5-DCP)] <sub>n</sub>                                                                           | 6.02 × 10 <sup>-3</sup>              | <b>This work</b> |
| [Cd(4-bpd)(SCN) <sub>2</sub> ] <sub>n</sub>                                                                | 2.90 × 10 <sup>-4</sup>              | 1                |
| {[Cd <sub>2</sub> (azbpy) <sub>2</sub> (HO-1,3-bdc) <sub>2</sub> ](azbpy)·(H <sub>2</sub> O)} <sub>n</sub> | 186                                  | 2                |
| Zn(OPE-C <sub>12</sub> )·2H <sub>2</sub> O                                                                 | 9.6 × 10 <sup>-4</sup>               | 3                |
| {[Zn(5-NIP) <sub>2</sub> (INH) <sub>2</sub> ].(DMF)(H <sub>2</sub> O) <sub>2</sub> } <sub>n</sub>          | 3.35 × 10 <sup>-4</sup>              | 4                |
| {[Cd(5-NIP) <sub>2</sub> (INH) <sub>2</sub> ].(DMF) <sub>2</sub> (H <sub>2</sub> O)} <sub>n</sub>          | 5.04 × 10 <sup>-4</sup>              | 4                |
| [Zn <sub>4</sub> (μ <sub>4</sub> -O)(DABA) <sub>6</sub> ]                                                  | 2.29 × 10 <sup>-7</sup>              | 5                |
| [Zn <sub>2</sub> (DABA) <sub>4</sub> (4,4'-BPY)] <sub>n</sub>                                              | 2.54 × 10 <sup>-3</sup>              | 5                |
| [Cu(5-nip)(3-Clpy) <sub>2</sub> ] <sub>n</sub>                                                             | 1.58 × 10 <sup>-3</sup>              | 6                |
| [Cu(5-nip)(3-Brpy) <sub>2</sub> ] <sub>n</sub>                                                             | 7.25 × 10 <sup>-4</sup>              | 6                |

## References

1. S. Halder, A. Dey, A. Bhattacharjee, J. Ortega-Castro, A. Frontera, P. P. Ray and P. Roy, *Dalton Trans.*, 2017, **46**, 11239-11249.
2. B. Bhattacharya, A. Layek, M. M. Alam, D. K. Maity, S. Chakrabarti, P. P. Ray and D. Ghoshal, *Chem. Commun.*, 2014, **50**, 7858-7861.
3. S. Roy, M. Das, A. Bandyopadhyay, S. K. Pati, P. P. Ray and T. K. Maji, *J. Phys. Chem. C*, 2017, **121**, 23803-23810.
4. K. Naskar, A. Dey, S. Maity, P. P. Ray and C. Sinha, *Cryst. Growth Des.*, 2021, **21**, 4847-4856.
5. S. Jana, J. Datta, S. Maity, B. Thakurta, P. P. Ray and C. Sinha, *Cryst. Growth Des.*, 2021, **21**, 5240-5250.
6. S. Naaz, P. Das, A. Frontera, B. Dutta, S. Khan, P. P. Ray and M. H. Mir, *Cryst. Growth Des.*, 2022, **22**, 5189-5197.
